# Supplementary material for: Poly (ADP-Ribose) Polymerase Inhibitor Treatment as a Novel Therapy Attenuating Renal Ischemia-Reperfusion Injury
Source: PubMed Central journal article supplement (PMC7597449; doi:10.3389/fimmu.2020.564288), 2020-10-14
Supplement: Image_1.pdf [file Image_1.pdf]

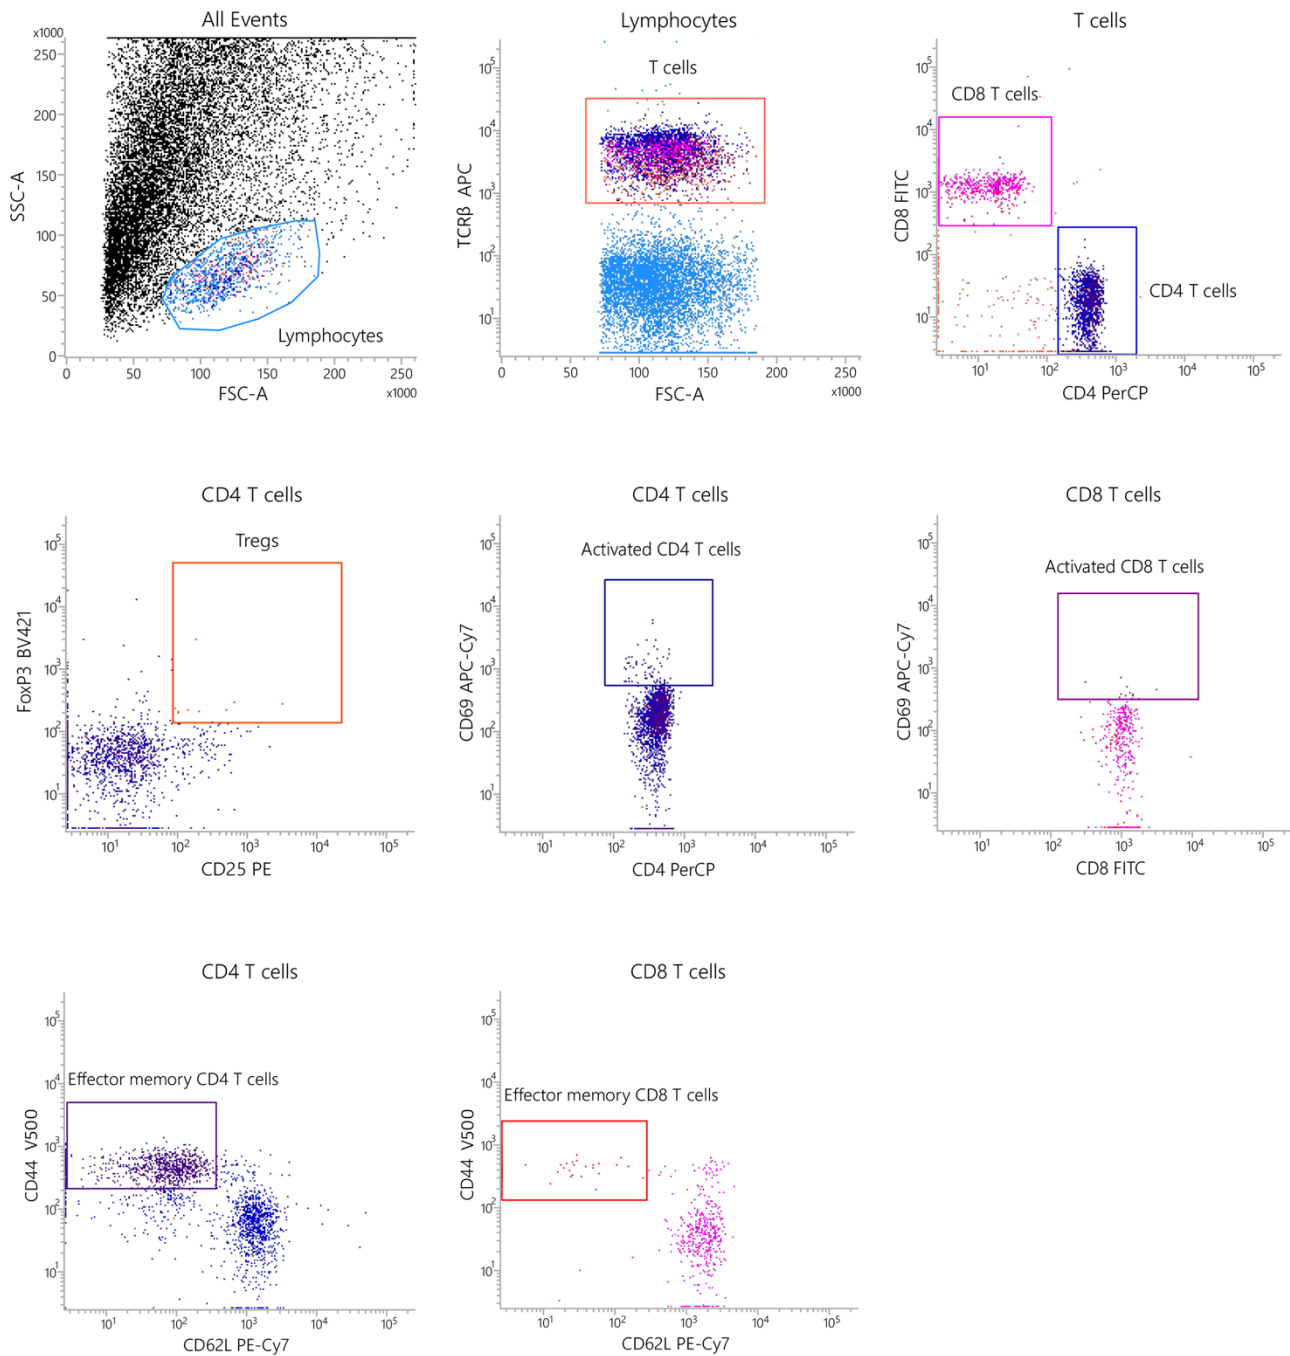

**Supplemental Figure 1: Flow cytometry gating strategies for T cell subsets.** KMNCs were stained with anti-TCR $\beta$  APC, anti-CD4 PerCP, anti-CD8 FITC, anti-CD25 PE, anti-FoxP3 BV421, anti-CD69 APC-Cy7, anti-CD44 V500, and anti-CD62L PE-Cy7. Lymphocytes were first identified with forward scatter (FSC) and side scatter (SSC) gates. TCR $\alpha\beta$ <sup>+</sup> cells were gated and then analyzed for the expression of CD4 and CD8. Regulatory T cells were identified by the CD25<sup>+</sup> and FoxP3<sup>+</sup> gates within CD4<sup>+</sup> T cells. Activated CD4 T and CD8 T cells were identified by the CD69<sup>+</sup> gate within CD4 and CD8 T cells, respectively. Effector memory CD4 and CD8 T cells were identified by the CD44<sup>high</sup> and CD62L<sup>-</sup> gates within CD4 and CD8 T cells, respectively.

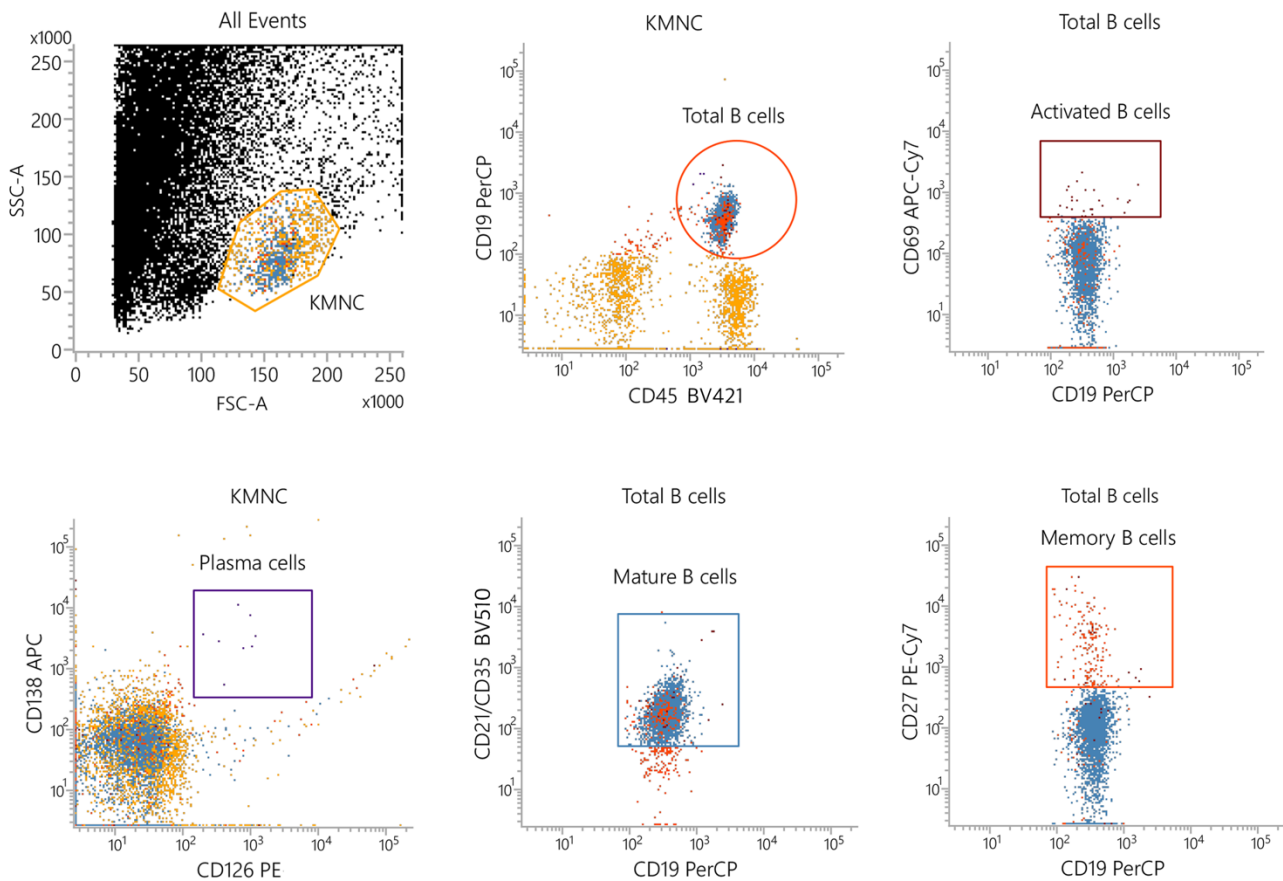

**Supplemental Figure 2: Flow cytometry gating strategies for B cell subsets.** KMNCs were stained with anti-CD45 BV421, anti-CD19 PerCP, anti-CD69 APC-Cy7, anti-CD126 PE, anti-CD138 APC, anti-CD21/35 BV510, and anti-CD27 PE-Cy7. Lymphocytes were first identified with FSC and SSC gates. Total B cells were identified by the CD45<sup>+</sup> and CD19<sup>+</sup> gates within the FSC and SSC based lymphocytes gate. Activated B cells were identified by the CD69<sup>+</sup> gate within total B cells. Plasma cells were identified by the CD126<sup>+</sup> and CD138<sup>+</sup> gates within the FSC and SSC based lymphocytes gate. Mature B cells were identified by the CD21/35<sup>+</sup> gate within total B cells. Memory B cells were identified by the CD27<sup>+</sup> gate within total B cells.

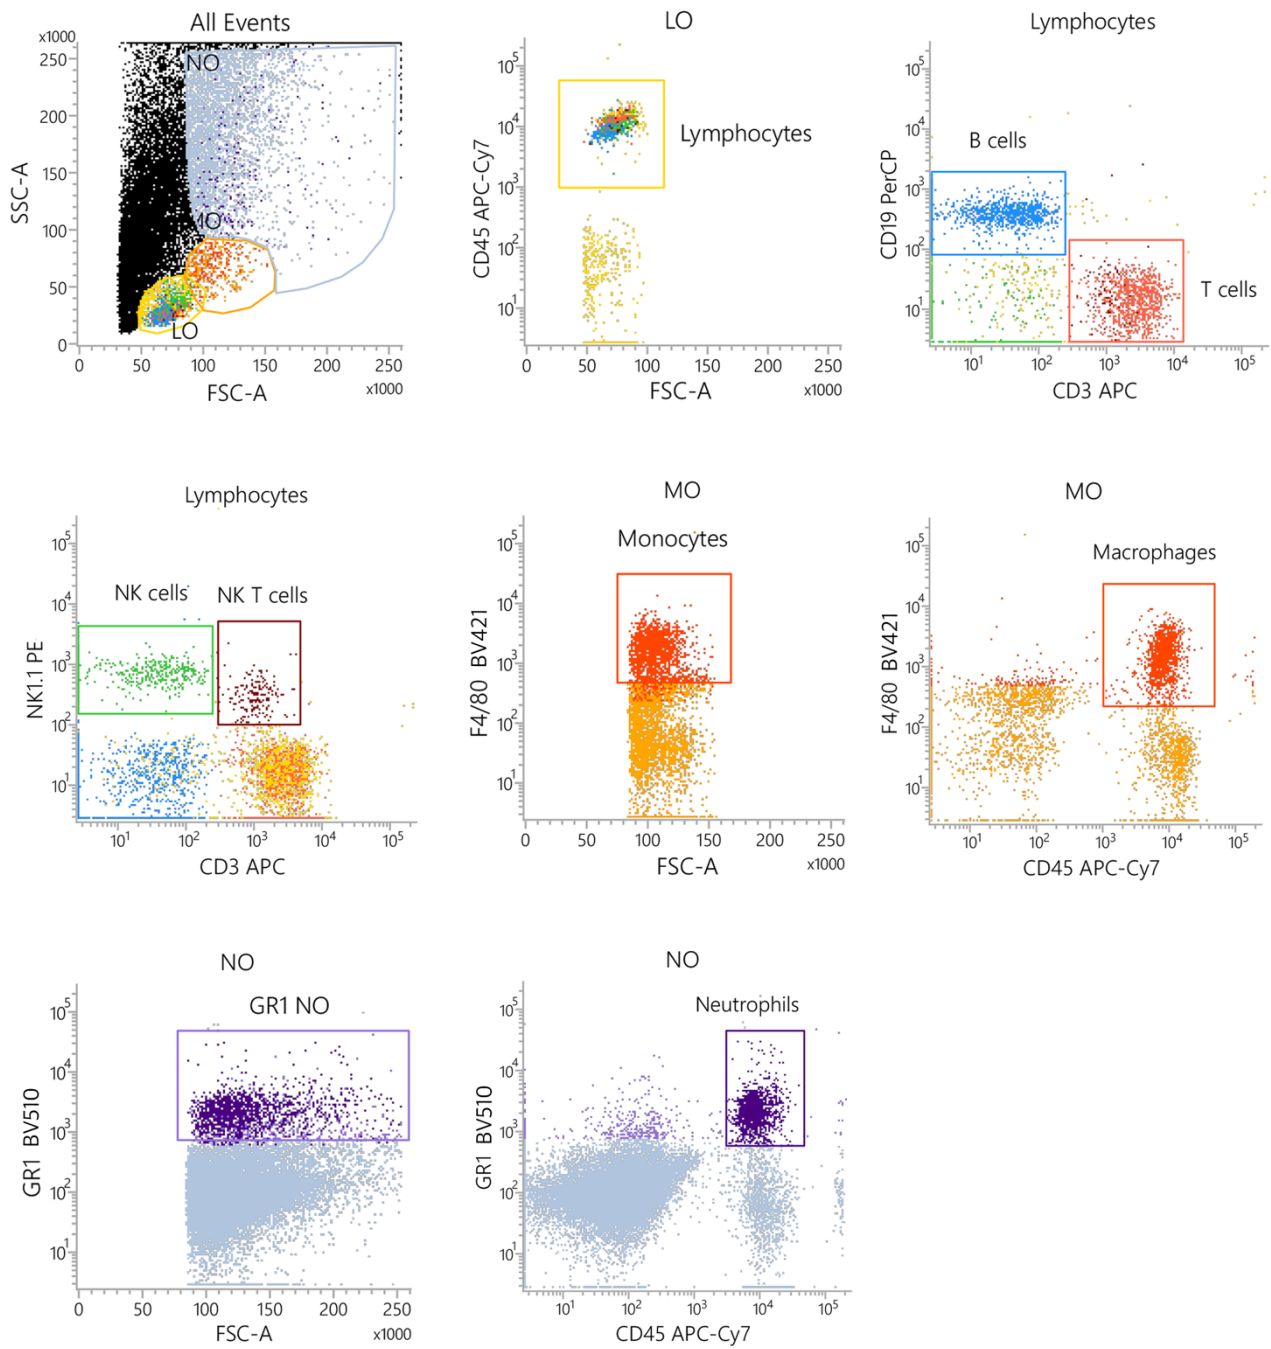

**Supplemental Figure 3: Flow cytometry gating strategies for NK cells, NK T cells, macrophages, and neutrophils.** KMNCs were stained with anti-CD45 APC-Cy7, anti-CD3 APC, anti-CD19 PerCP, anti-NK1.1 PE, anti-F4/80 BV421, and anti-GR1 BV510. Lymphocytes (yellow color), monocytes (orange color), and granulocytes (light blue color) were first identified based on their FSC and SSC. CD45<sup>+</sup> cells were gated to identify lymphocytes within FSC and SSC based lymphocytes population. NK T cells were identified by the CD3<sup>+</sup> and NK1.1<sup>+</sup> gates within the lymphocytes gate. NK cells were identified by the CD3<sup>-</sup> and NK1.1<sup>+</sup> gates within lymphocytes. Macrophages were identified by the CD45<sup>+</sup> and F4/80<sup>+</sup> gates within the FSC and SSC based monocyte population. Neutrophils were identified by the CD45<sup>+</sup> and GR1<sup>+</sup> gates within the FSC and SSC based granulocyte population.
